# Supplementary material
Source: publisher figshare collection journal article supplement (https://gsajournals.figshare.com/ndownloader/files/25800065)
Supplement: Supplementary file 1 [file 25800065]

## Sheet: Differentiation Ref Genes
FlybaseID	GeneSymbol	Eye expression Reference	PMID
Genes expressed posterior to the MF
FBgn0033268	Obp44a	(Firth, 2007)	17553483
FBgn0034070	SP2353	(Firth, 2007)	17553483
FBgn0260400	elav	Robinow 1988)	3144044
FBgn0002576	lz	(Flores, 1998)	11051549
FBgn0000206	boss	(Kramer, 1991)	1857416
FBgn0000313	chp	(Haug-Collet, 1999)	6818557
FBgn0033652	ths	(Firth, 2007)	17553483
FBgn0004618	gl	(Moses, 1991)	2010085
FBgn0003366	sev	(Tomlinson, 1987)	3115593
FBgn0032022	CG14275	(Firth, 2007)	17553483
FBgn0039723	CG15522	(Firth, 2007)	17553483
FBgn0000635	Fas2	(Mao, 2009)	19141676
FBgn0004795	retn	(Jasper, 2002)	12408803
FBgn0017590	klg	(Butler, 1997)	9043060
FBgn0028999	nerfin-1	(Stivers, 2000)	11025227
FBgn0000363	cpo	(Firth, 2007)	17553483
FBgn0000108	Appl	(Mora, 2013)	23178937
FBgn0259246	brp	(Firth, 2007)	17553483
FBgn0029123	SoxN	(Cremazy, 2001)	11731252
FBgn0052227	gogo	(Tomasi, 2008)	18341990
FBgn0000320	eya	(Bonini, 1993)	8431945
FBgn0026319	Traf4	(Preiss, 2001)	11118894
FBgn0003285	rst	(Ramos, 1993)	7503814
FBgn0010452	trn	(Mao, 2008)	18350163
Genes expressed anterior to the MF
FBgn0261458	capt	(Benlali, 2000)	10847682
FBgn0005558	Ey	(Plaza, 2001)	11179224
FBgn0025360	optix	(Plaza, 2001)	11179224
FBgn0003866	tsh	(Pan, 1998)	9860999
FBgn0001235	Hth	(Pai, 1998)	9450936
Genes associated with growth and proliferation anterior to the MF
FBgn0019650	toy	(Czerny, 1999)	10198632
FBgn0015625	CycB3	(Selleck 1991)	1898850
FBgn0000405	CycB	(Selleck 1991)	1898850
FBgn0010382	CycE	(Finley, 1996)	8610160
FBgn0003062	Fib	(Baker, 2013)	23472166
FBgn0010315	CycD	(Finley, 1996)	8610160
